# Supplementary material for: Immunogenicity and Protective Efficacy against Murine Tuberculosis of a Prime-Boost Regimen with BCG and a DNA Vaccine Expressing ESAT-6 and Ag85A Fusion Protein
Source: Hindawi journal article supplement (doi:10.1155/2011/617892), 2011-01-01
Supplement: f1 [file 617892.f1.pdf]

Supplementary Table 1. Primer sequences and cycle parameters for murine cytokines by qRT-PCR analysis

|               |   | Primer sequences ( 5'-3' ) | Cycle parameters                                         |
|---------------|---|----------------------------|----------------------------------------------------------|
| GAPDH         | F | GACCAGGTTGTCTCCTGCGACTTC   | 95 °C 3min; 40 cycles of 95°C 15s, 60 °C 20s, 72 °C 20s; |
|               | R | GGTGGGTGGTCCAGGGTTTCTTAC   |                                                          |
| IFN- $\gamma$ | F | GGCTGTCCCTGAAAGAAAGC       |                                                          |
|               | R | GAGOGAGTTATTTGTCATTCGG     |                                                          |
| IL-10         | F | GGTTGCCAAGCCTTATCGGA       |                                                          |
|               | R | ACCTGCTCCACTGCCTTGCT       |                                                          |
